# Supplementary material
Source: publisher figshare collection journal article supplement (https://acs.figshare.com/ndownloader/files/4328740)
Supplement: Supplementary file 1 [file 4328740]

 
data_complex1 
 
_audit_creation_method            SHELXL-97 
_chemical_name_systematic 
; 
 ? 
; 
_chemical_name_common             ? 
_chemical_melting_point           ? 
_chemical_formula_moiety          'C6 H3 Ag2 Cl O4 S'  
_chemical_formula_sum 
 'C6 H3 Ag2 Cl O4 S' 
_chemical_formula_weight          422.33 
 
loop_ 
 _atom_type_symbol 
 _atom_type_description 
 _atom_type_scat_dispersion_real 
 _atom_type_scat_dispersion_imag 
 _atom_type_scat_source 
 'C'  'C'   0.0033   0.0016 
 'International Tables Vol C Tables 4.2.6.8 and 6.1.1.4' 
 'H'  'H'   0.0000   0.0000 
 'International Tables Vol C Tables 4.2.6.8 and 6.1.1.4' 
 'O'  'O'   0.0106   0.0060 
 'International Tables Vol C Tables 4.2.6.8 and 6.1.1.4' 
 'S'  'S'   0.1246   0.1234 
 'International Tables Vol C Tables 4.2.6.8 and 6.1.1.4' 
 'Cl'  'Cl'   0.1484   0.1585 
 'International Tables Vol C Tables 4.2.6.8 and 6.1.1.4' 
 'Ag'  'Ag'  -0.8971   1.1015 
 'International Tables Vol C Tables 4.2.6.8 and 6.1.1.4' 
 
_symmetry_cell_setting            'monoclinic'
_symmetry_space_group_name_H-M    'P 21/c'
_symmetry_space_group_name_Hall   '-P 2ybc' 
 
loop_ 
 _symmetry_equiv_pos_as_xyz 
 'x, y, z' 
 '-x, y+1/2, -z+1/2' 
 '-x, -y, -z' 
 'x, -y-1/2, z-1/2' 
 
_cell_length_a                    11.6822(8) 
_cell_length_b                    11.7376(8) 
_cell_length_c                    6.2220(4) 
_cell_angle_alpha                 90.00 
_cell_angle_beta                  90.0466(18) 
_cell_angle_gamma                 90.00 
_cell_volume                      853.17(10) 
_cell_formula_units_Z             4 
_cell_measurement_temperature     295(2) 
_cell_measurement_reflns_used     7532 
_cell_measurement_theta_min       3.28 
_cell_measurement_theta_max       27.47 
 
_exptl_crystal_description        'prism'  
_exptl_crystal_colour             'colorless' 
_exptl_crystal_size_max           0.17 
_exptl_crystal_size_mid           0.14 
_exptl_crystal_size_min           0.12 
_exptl_crystal_density_meas       ? 
_exptl_crystal_density_diffrn     3.288 
_exptl_crystal_density_method     'not measured' 
_exptl_crystal_F_000              792 
_exptl_absorpt_coefficient_mu     5.125 
_exptl_absorpt_correction_type    'multi-scan' 
_exptl_absorpt_correction_T_min   0.4762 
_exptl_absorpt_correction_T_max   0.5783 
_exptl_absorpt_process_details    'ABSCOR (Higashi, 1995)' 
 
_exptl_special_details 
; 
 ? 
; 
 
_diffrn_ambient_temperature       295(2) 
_diffrn_radiation_wavelength      0.71073 
_diffrn_radiation_type            MoK\a 
_diffrn_radiation_source          'fine-focus sealed tube' 
_diffrn_radiation_monochromator   graphite 
_diffrn_measurement_device_type   'Rigaku RAXIS-RAPID' 
_diffrn_measurement_method        '\w' 
_diffrn_detector_area_resol_mean  '10.000'  
_diffrn_standards_number          0 
_diffrn_standards_interval_count  0 
_diffrn_standards_interval_time   0 
_diffrn_standards_decay_%         0  
_diffrn_reflns_number             8366 
_diffrn_reflns_av_R_equivalents   0.0332 
_diffrn_reflns_av_sigmaI/netI     0.0393 
_diffrn_reflns_limit_h_min        -15 
_diffrn_reflns_limit_h_max        15 
_diffrn_reflns_limit_k_min        -15 
_diffrn_reflns_limit_k_max        15 
_diffrn_reflns_limit_l_min        -7 
_diffrn_reflns_limit_l_max        8 
_diffrn_reflns_theta_min          3.27 
_diffrn_reflns_theta_max          27.47 
_reflns_number_total              1937 
_reflns_number_gt                 1830 
_reflns_threshold_expression      >2sigma(I) 
 
_computing_data_collection        'RAPID-AUTO (Rigaku Corporation, 1998)' 
_computing_cell_refinement        'RAPID-AUTO' 
_computing_data_reduction         
'CrystalStructure (Rigaku/MSC and Rigaku Corporation, 2002)'  
_computing_structure_solution     'SHELXS-97 (Sheldrick, 1997)' 
_computing_structure_refinement   'SHELXL-97 (Sheldrick, 1997)' 
_computing_molecular_graphics     'SHELXL-97' 
_computing_publication_material   'SHELXL-97'
 
_refine_special_details 
; 
 Refinement of F^2^ against ALL reflections.  The weighted R-factor wR and 
 goodness of fit S are based on F^2^, conventional R-factors R are based 
 on F, with F set to zero for negative F^2^. The threshold expression of 
 F^2^ > 2sigma(F^2^) is used only for calculating R-factors(gt) etc. and is 
 not relevant to the choice of reflections for refinement.  R-factors based 
 on F^2^ are statistically about twice as large as those based on F, and R- 
 factors based on ALL data will be even larger. 
; 
 
_refine_ls_structure_factor_coef  Fsqd  
_refine_ls_matrix_type            full 
_refine_ls_weighting_scheme       calc  
_refine_ls_weighting_details 
 'calc w=1/[\s^2^(Fo^2^)+(0.0345P)^2^+0.6367P] where P=(Fo^2^+2Fc^2^)/3' 
_atom_sites_solution_primary      direct 
_atom_sites_solution_secondary    difmap 
_atom_sites_solution_hydrogens    geom 
_refine_ls_hydrogen_treatment     constr 
_refine_ls_extinction_method      none 
_refine_ls_extinction_coef        ? 
_refine_ls_number_reflns          1937 
_refine_ls_number_parameters      128 
_refine_ls_number_restraints      0 
_refine_ls_R_factor_all           0.0268 
_refine_ls_R_factor_gt            0.0250 
_refine_ls_wR_factor_ref          0.0614 
_refine_ls_wR_factor_gt           0.0604 
_refine_ls_goodness_of_fit_ref    1.060 
_refine_ls_restrained_S_all       1.060 
_refine_ls_shift/su_max           0.001 
_refine_ls_shift/su_mean          0.000 
 
loop_ 
 _atom_site_label 
 _atom_site_type_symbol 
 _atom_site_fract_x 
 _atom_site_fract_y 
 _atom_site_fract_z 
 _atom_site_U_iso_or_equiv 
 _atom_site_adp_type 
 _atom_site_occupancy 
 _atom_site_symmetry_multiplicity 
 _atom_site_calc_flag 
 _atom_site_refinement_flags 
 _atom_site_disorder_assembly 
 _atom_site_disorder_group 
Ag1 Ag 0.54070(4) 0.87002(3) 0.79941(8) 0.03606(11) Uani 1 1 d . . . 
Ag2 Ag 0.34628(4) 0.65018(3) 0.89841(7) 0.03862(12) Uani 1 1 d . . . 
S1 S 0.63688(9) 0.59636(8) 0.79269(18) 0.0222(2) Uani 1 1 d . . . 
Cl1 Cl 0.96623(14) 0.63697(11) 0.1949(3) 0.0472(3) Uani 1 1 d . . . 
O1 O 0.6665(3) 0.7159(2) 0.7926(5) 0.0299(7) Uani 1 1 d . . . 
O2 O 0.5211(3) 0.5781(3) 0.7053(6) 0.0332(7) Uani 1 1 d . . . 
O3 O 0.6512(3) 0.5435(2) 1.0045(5) 0.0334(7) Uani 1 1 d . . . 
O4 O 0.6585(3) 0.3406(2) 0.6948(6) 0.0285(7) Uani 1 1 d . . . 
C1 C 0.7310(3) 0.5276(3) 0.6128(7) 0.0210(8) Uani 1 1 d . . . 
C2 C 0.7268(4) 0.4085(3) 0.5832(7) 0.0239(8) Uani 1 1 d . . . 
C3 C 0.8050(4) 0.3641(4) 0.4279(8) 0.0285(10) Uani 1 1 d . . . 
H3 H 0.8062 0.2860 0.4029 0.034 Uiso 1 1 calc R . . 
C4 C 0.8783(4) 0.4325(4) 0.3148(8) 0.0318(10) Uani 1 1 d . . . 
H4 H 0.9285 0.4004 0.2159 0.038 Uiso 1 1 calc R . . 
C5 C 0.8778(4) 0.5487(4) 0.3469(7) 0.0291(10) Uani 1 1 d . . . 
C6 C 0.8059(4) 0.5972(4) 0.4979(8) 0.0258(9) Uani 1 1 d . . . 
H6 H 0.8074 0.6753 0.5224 0.031 Uiso 1 1 calc R . . 
 
loop_ 
 _atom_site_aniso_label 
 _atom_site_aniso_U_11 
 _atom_site_aniso_U_22 
 _atom_site_aniso_U_33 
 _atom_site_aniso_U_23 
 _atom_site_aniso_U_13 
 _atom_site_aniso_U_12 
Ag1 0.0403(2) 0.03061(18) 0.0373(2) 0.00240(15) 0.0069(2) 0.00932(15) 
Ag2 0.0578(3) 0.02116(16) 0.0370(2) 0.00594(14) 0.0080(2) 0.00943(16) 
S1 0.0286(5) 0.0157(4) 0.0222(4) -0.0002(4) 0.0034(5) 0.0005(4) 
Cl1 0.0489(8) 0.0454(7) 0.0474(7) 0.0070(6) 0.0216(8) -0.0088(6) 
O1 0.0398(18) 0.0152(13) 0.0346(15) -0.0013(13) 0.0055(16) 0.0000(12) 
O2 0.0304(18) 0.0328(16) 0.0364(17) -0.0062(15) 0.0019(16) -0.0001(13) 
O3 0.055(2) 0.0241(14) 0.0216(13) 0.0033(13) 0.0074(17) 0.0042(15) 
O4 0.0377(18) 0.0173(13) 0.0305(15) 0.0021(13) 0.0061(17) -0.0007(12) 
C1 0.0206(19) 0.0173(17) 0.0250(19) -0.0008(16) -0.0019(17) 0.0033(15) 
C2 0.026(2) 0.0193(18) 0.027(2) 0.0022(17) -0.0039(19) 0.0018(16) 
C3 0.034(3) 0.022(2) 0.029(2) -0.0082(17) 0.002(2) 0.0056(16) 
C4 0.031(2) 0.031(2) 0.034(2) -0.003(2) 0.008(2) 0.0034(18) 
C5 0.026(2) 0.032(2) 0.029(2) 0.0046(17) 0.0053(17) 0.0009(18) 
C6 0.029(2) 0.0209(19) 0.028(2) 0.0009(17) -0.002(2) -0.0017(16) 
 
_geom_special_details 
; 
 All esds (except the esd in the dihedral angle between two l.s. planes) 
 are estimated using the full covariance matrix.  The cell esds are taken 
 into account individually in the estimation of esds in distances, angles 
 and torsion angles; correlations between esds in cell parameters are only 
 used when they are defined by crystal symmetry.  An approximate (isotropic) 
 treatment of cell esds is used for estimating esds involving l.s. planes. 
; 
 
loop_ 
 _geom_bond_atom_site_label_1 
 _geom_bond_atom_site_label_2 
 _geom_bond_distance 
 _geom_bond_site_symmetry_2 
 _geom_bond_publ_flag 
Ag1 O1 2.331(3) . ? 
Ag1 O4 2.353(4) 2_656 ? 
Ag1 O3 2.463(3) 4_575 ? 
Ag1 O2 2.548(3) 2_656 ? 
Ag1 O2 2.608(3) 4_576 ? 
Ag2 O4 2.309(3) 2_656 ? 
Ag2 O3 2.353(3) 3_667 ? 
Ag2 O2 2.517(3) . ? 
Ag2 O4 2.534(3) 3_667 ? 
Ag2 C3 2.696(5) 3_666 ? 
S1 O1 1.445(3) . ? 
S1 O3 1.466(3) . ? 
S1 O2 1.473(4) . ? 
S1 C1 1.765(4) . ? 
Cl1 C5 1.743(4) . ? 
O2 Ag1 2.548(3) 2_646 ? 
O3 Ag2 2.353(3) 3_667 ? 
O3 Ag1 2.463(3) 4_576 ? 
O4 C2 1.325(6) . ? 
O4 Ag2 2.309(3) 2_646 ? 
O4 Ag1 2.353(4) 2_646 ? 
O4 Ag2 2.534(3) 3_667 ? 
C1 C6 1.394(6) . ? 
C1 C2 1.411(5) . ? 
C2 C3 1.429(6) . ? 
C3 C4 1.369(7) . ? 
C3 Ag2 2.696(5) 3_666 ? 
C3 H3 0.9300 . ? 
C4 C5 1.379(6) . ? 
C4 H4 0.9300 . ? 
C5 C6 1.384(7) . ? 
C6 H6 0.9300 . ? 
 
loop_ 
 _geom_angle_atom_site_label_1 
 _geom_angle_atom_site_label_2 
 _geom_angle_atom_site_label_3 
 _geom_angle 
 _geom_angle_site_symmetry_1 
 _geom_angle_site_symmetry_3 
 _geom_angle_publ_flag 
O1 Ag1 O4 120.64(10) . 2_656 ? 
O1 Ag1 O3 88.60(11) . 4_575 ? 
O4 Ag1 O3 126.22(13) 2_656 4_575 ? 
O1 Ag1 O2 157.33(10) . 2_656 ? 
O4 Ag1 O2 81.99(10) 2_656 2_656 ? 
O3 Ag1 O2 75.23(10) 4_575 2_656 ? 
O2 Ag1 O1 104.75(11) 4_576 . ? 
O2 Ag1 O2 76.24(11) 4_576 2_656 ? 
O2 Ag1 O3 132.19(11) 4_576 4_575 ? 
O2 Ag1 O4 86.09(12) 4_576 2_656 ? 
O4 Ag2 O3 179.25(13) 2_656 3_667 ? 
O4 Ag2 O2 102.99(12) 2_656 . ? 
O3 Ag2 O2 77.75(12) 3_667 . ? 
O4 Ag2 O4 102.06(9) 2_656 3_667 ? 
O3 Ag2 O4 77.60(10) 3_667 3_667 ? 
O2 Ag2 O4 120.65(12) . 3_667 ? 
O4 Ag2 C3 81.67(13) 2_656 3_666 ? 
O3 Ag2 C3 98.13(13) 3_667 3_666 ? 
O2 Ag2 C3 98.71(13) . 3_666 ? 
O4 Ag2 C3 137.72(15) 3_667 3_666 ? 
O1 S1 O3 112.58(19) . . ? 
O1 S1 O2 111.1(2) . . ? 
O3 S1 O2 112.0(2) . . ? 
O1 S1 C1 107.12(19) . . ? 
O3 S1 C1 107.8(2) . . ? 
O2 S1 C1 105.8(2) . . ? 
S1 O1 Ag1 127.1(2) . . ? 
S1 O2 Ag2 121.35(19) . . ? 
S1 O2 Ag1 113.82(18) . 2_646 ? 
Ag2 O2 Ag1 95.59(11) . 2_646 ? 
S1 O3 Ag2 129.86(19) . 3_667 ? 
S1 O3 Ag1 115.84(18) . 4_576 ? 
Ag2 O3 Ag1 102.32(11) 3_667 4_576 ? 
C2 O4 Ag2 117.7(3) . 2_646 ? 
C2 O4 Ag1 121.0(3) . 2_646 ? 
Ag2 O4 Ag1 97.02(13) 2_646 2_646 ? 
C2 O4 Ag2 120.8(3) . 3_667 ? 
Ag2 O4 Ag2 106.97(11) 2_646 3_667 ? 
Ag1 O4 Ag2 87.47(11) 2_646 3_667 ? 
C6 C1 C2 122.3(4) . . ? 
C6 C1 S1 116.7(3) . . ? 
C2 C1 S1 120.9(3) . . ? 
O4 C2 C1 123.3(4) . . ? 
O4 C2 C3 121.4(4) . . ? 
C1 C2 C3 115.3(4) . . ? 
C4 C3 C2 122.3(4) . . ? 
C4 C3 Ag2 93.4(3) . 3_666 ? 
C2 C3 Ag2 96.5(3) . 3_666 ? 
C4 C3 H3 118.8 . . ? 
C2 C3 H3 118.8 . . ? 
Ag2 C3 H3 79.8 3_666 . ? 
C3 C4 C5 120.2(4) . . ? 
C3 C4 H4 119.9 . . ? 
C5 C4 H4 119.9 . . ? 
C4 C5 C6 120.5(4) . . ? 
C4 C5 Cl1 120.5(4) . . ? 
C6 C5 Cl1 119.0(4) . . ? 
C5 C6 C1 119.3(4) . . ? 
C5 C6 H6 120.4 . . ? 
C1 C6 H6 120.4 . . ? 
 
loop_ 
 _geom_torsion_atom_site_label_1 
 _geom_torsion_atom_site_label_2 
 _geom_torsion_atom_site_label_3 
 _geom_torsion_atom_site_label_4 
 _geom_torsion 
 _geom_torsion_site_symmetry_1 
 _geom_torsion_site_symmetry_2 
 _geom_torsion_site_symmetry_3 
 _geom_torsion_site_symmetry_4 
 _geom_torsion_publ_flag 
O3 S1 O1 Ag1 -101.9(3) . . . . ? 
O2 S1 O1 Ag1 24.6(3) . . . . ? 
C1 S1 O1 Ag1 139.7(2) . . . . ? 
O4 Ag1 O1 S1 -0.4(3) 2_656 . . . ? 
O3 Ag1 O1 S1 -132.7(2) 4_575 . . . ? 
O2 Ag1 O1 S1 -176.6(2) 2_656 . . . ? 
O1 S1 O2 Ag2 -66.4(3) . . . . ? 
O3 S1 O2 Ag2 60.5(2) . . . . ? 
C1 S1 O2 Ag2 177.71(19) . . . . ? 
O1 S1 O2 Ag1 -179.55(16) . . . 2_646 ? 
O3 S1 O2 Ag1 -52.7(2) . . . 2_646 ? 
C1 S1 O2 Ag1 64.5(2) . . . 2_646 ? 
O4 Ag2 O2 S1 80.1(2) 2_656 . . . ? 
O3 Ag2 O2 S1 -100.0(2) 3_667 . . . ? 
O4 Ag2 O2 S1 -32.6(3) 3_667 . . . ? 
C3 Ag2 O2 S1 163.5(2) 3_666 . . . ? 
O4 Ag2 O2 Ag1 -157.54(13) 2_656 . . 2_646 ? 
O3 Ag2 O2 Ag1 22.34(12) 3_667 . . 2_646 ? 
O4 Ag2 O2 Ag1 89.76(13) 3_667 . . 2_646 ? 
C3 Ag2 O2 Ag1 -74.15(14) 3_666 . . 2_646 ? 
O1 S1 O3 Ag2 -166.6(2) . . . 3_667 ? 
O2 S1 O3 Ag2 67.3(3) . . . 3_667 ? 
C1 S1 O3 Ag2 -48.7(3) . . . 3_667 ? 
O1 S1 O3 Ag1 57.9(3) . . . 4_576 ? 
O2 S1 O3 Ag1 -68.2(2) . . . 4_576 ? 
C1 S1 O3 Ag1 175.83(18) . . . 4_576 ? 
O1 S1 C1 C6 -4.6(4) . . . . ? 
O3 S1 C1 C6 -126.0(4) . . . . ? 
O2 S1 C1 C6 114.0(4) . . . . ? 
O1 S1 C1 C2 177.5(4) . . . . ? 
O3 S1 C1 C2 56.1(4) . . . . ? 
O2 S1 C1 C2 -63.8(4) . . . . ? 
Ag2 O4 C2 C1 174.9(3) 2_646 . . . ? 
Ag1 O4 C2 C1 56.4(5) 2_646 . . . ? 
Ag2 O4 C2 C1 -50.9(6) 3_667 . . . ? 
Ag2 O4 C2 C3 -7.4(6) 2_646 . . . ? 
Ag1 O4 C2 C3 -125.9(4) 2_646 . . . ? 
Ag2 O4 C2 C3 126.8(4) 3_667 . . . ? 
C6 C1 C2 O4 178.1(5) . . . . ? 
S1 C1 C2 O4 -4.2(6) . . . . ? 
C6 C1 C2 C3 0.3(7) . . . . ? 
S1 C1 C2 C3 178.0(4) . . . . ? 
O4 C2 C3 C4 -178.3(5) . . . . ? 
C1 C2 C3 C4 -0.5(7) . . . . ? 
O4 C2 C3 Ag2 83.5(4) . . . 3_666 ? 
C1 C2 C3 Ag2 -98.6(4) . . . 3_666 ? 
C2 C3 C4 C5 -0.6(8) . . . . ? 
Ag2 C3 C4 C5 99.2(5) 3_666 . . . ? 
C3 C4 C5 C6 1.8(8) . . . . ? 
C3 C4 C5 Cl1 -177.1(4) . . . . ? 
C4 C5 C6 C1 -2.0(7) . . . . ? 
Cl1 C5 C6 C1 177.0(4) . . . . ? 
C2 C1 C6 C5 0.9(7) . . . . ? 
S1 C1 C6 C5 -176.9(4) . . . . ? 
 
_diffrn_measured_fraction_theta_max    0.997 
_diffrn_reflns_theta_full              27.47 
_diffrn_measured_fraction_theta_full   0.997 
_refine_diff_density_max    0.858 
_refine_diff_density_min   -0.794 
_refine_diff_density_rms    0.127 

#===END

 
data_complex2 
 
_audit_creation_method            SHELXL-97 
_chemical_name_systematic 
; 
 ? 
; 
_chemical_name_common             ? 
_chemical_melting_point           ? 
_chemical_formula_moiety          'C6 H5 Ag2 Cl O5 S' 
_chemical_formula_sum 
 'C6 H5 Ag2 Cl O5 S' 
_chemical_formula_weight          440.35 
 
loop_ 
 _atom_type_symbol 
 _atom_type_description 
 _atom_type_scat_dispersion_real 
 _atom_type_scat_dispersion_imag 
 _atom_type_scat_source 
 'C'  'C'   0.0033   0.0016 
 'International Tables Vol C Tables 4.2.6.8 and 6.1.1.4' 
 'H'  'H'   0.0000   0.0000 
 'International Tables Vol C Tables 4.2.6.8 and 6.1.1.4' 
 'O'  'O'   0.0106   0.0060 
 'International Tables Vol C Tables 4.2.6.8 and 6.1.1.4' 
 'S'  'S'   0.1246   0.1234 
 'International Tables Vol C Tables 4.2.6.8 and 6.1.1.4' 
 'Cl'  'Cl'   0.1484   0.1585 
 'International Tables Vol C Tables 4.2.6.8 and 6.1.1.4' 
 'Ag'  'Ag'  -0.8971   1.1015 
 'International Tables Vol C Tables 4.2.6.8 and 6.1.1.4' 
 
_symmetry_cell_setting            'monoclinic'
_symmetry_space_group_name_H-M    'P 21/c'
_symmetry_space_group_name_Hall   '-P 2ybc' 
 
loop_ 
 _symmetry_equiv_pos_as_xyz 
 'x, y, z' 
 '-x, y+1/2, -z+1/2' 
 '-x, -y, -z' 
 'x, -y-1/2, z-1/2' 
 
_cell_length_a                    9.6946(19) 
_cell_length_b                    11.245(2) 
_cell_length_c                    9.2827(19) 
_cell_angle_alpha                 90.00 
_cell_angle_beta                  100.76(3) 
_cell_angle_gamma                 90.00 
_cell_volume                      994.2(3) 
_cell_formula_units_Z             4 
_cell_measurement_temperature     295(2) 
_cell_measurement_reflns_used     8651 
_cell_measurement_theta_min       3.33 
_cell_measurement_theta_max       27.41 
 
_exptl_crystal_description        'prism'  
_exptl_crystal_colour             'colorless' 
_exptl_crystal_size_max           0.16 
_exptl_crystal_size_mid           0.12 
_exptl_crystal_size_min           0.11 
_exptl_crystal_density_meas       ? 
_exptl_crystal_density_diffrn     2.942 
_exptl_crystal_density_method     'not measured' 
_exptl_crystal_F_000              832 
_exptl_absorpt_coefficient_mu     4.412 
_exptl_absorpt_correction_type    'multi-scan'  
_exptl_absorpt_correction_T_min   0.5387 
_exptl_absorpt_correction_T_max   0.6425 
_exptl_absorpt_process_details    'ABSCOR (Higashi, 1995)'  
 
_exptl_special_details 
; 
 ? 
; 
 
_diffrn_ambient_temperature       295(2) 
_diffrn_radiation_wavelength      0.71073 
_diffrn_radiation_type            MoK\a 
_diffrn_radiation_source          'fine-focus sealed tube' 
_diffrn_radiation_monochromator   graphite 
_diffrn_measurement_device_type   'Rigaku RAXIS-RAPID' 
_diffrn_measurement_method        '\w' 
_diffrn_detector_area_resol_mean  '10.000'  
_diffrn_standards_number          0 
_diffrn_standards_interval_count  0 
_diffrn_standards_interval_time   0 
_diffrn_standards_decay_%         0  
_diffrn_reflns_number             9516 
_diffrn_reflns_av_R_equivalents   0.0309 
_diffrn_reflns_av_sigmaI/netI     0.0255 
_diffrn_reflns_limit_h_min        -12 
_diffrn_reflns_limit_h_max        12 
_diffrn_reflns_limit_k_min        -14 
_diffrn_reflns_limit_k_max        14 
_diffrn_reflns_limit_l_min        -11 
_diffrn_reflns_limit_l_max        12 
_diffrn_reflns_theta_min          3.33 
_diffrn_reflns_theta_max          27.42 
_reflns_number_total              2264 
_reflns_number_gt                 2125 
_reflns_threshold_expression      >2sigma(I) 
 
_computing_data_collection        'RAPID-AUTO (Rigaku Corporation, 1998)' 
_computing_cell_refinement        'RAPID-AUTO' 
_computing_data_reduction         
'CrystalStructure (Rigaku/MSC and Rigaku Corporation, 2002)'  
_computing_structure_solution     'SHELXS-97 (Sheldrick, 1997)' 
_computing_structure_refinement   'SHELXL-97 (Sheldrick, 1997)' 
_computing_molecular_graphics     'SHELXL-97' 
_computing_publication_material   'SHELXL-97'
 
_refine_special_details 
; 
 Refinement of F^2^ against ALL reflections.  The weighted R-factor wR and 
 goodness of fit S are based on F^2^, conventional R-factors R are based 
 on F, with F set to zero for negative F^2^. The threshold expression of 
 F^2^ > 2sigma(F^2^) is used only for calculating R-factors(gt) etc. and is 
 not relevant to the choice of reflections for refinement.  R-factors based 
 on F^2^ are statistically about twice as large as those based on F, and R- 
 factors based on ALL data will be even larger. 
; 
 
_refine_ls_structure_factor_coef  Fsqd  
_refine_ls_matrix_type            full 
_refine_ls_weighting_scheme       calc  
_refine_ls_weighting_details 
 'calc w=1/[\s^2^(Fo^2^)+(0.0338P)^2^+1.9097P] where P=(Fo^2^+2Fc^2^)/3' 
_atom_sites_solution_primary      direct 
_atom_sites_solution_secondary    difmap 
_atom_sites_solution_hydrogens    geom 
_refine_ls_hydrogen_treatment     mixed 
_refine_ls_extinction_method      none 
_refine_ls_extinction_coef        ? 
_refine_ls_number_reflns          2264 
_refine_ls_number_parameters      142 
_refine_ls_number_restraints      3 
_refine_ls_R_factor_all           0.0303 
_refine_ls_R_factor_gt            0.0282 
_refine_ls_wR_factor_ref          0.0710 
_refine_ls_wR_factor_gt           0.0697 
_refine_ls_goodness_of_fit_ref    1.071 
_refine_ls_restrained_S_all       1.070 
_refine_ls_shift/su_max           0.003 
_refine_ls_shift/su_mean          0.000 
 
loop_ 
 _atom_site_label 
 _atom_site_type_symbol 
 _atom_site_fract_x 
 _atom_site_fract_y 
 _atom_site_fract_z 
 _atom_site_U_iso_or_equiv 
 _atom_site_adp_type 
 _atom_site_occupancy 
 _atom_site_symmetry_multiplicity 
 _atom_site_calc_flag 
 _atom_site_refinement_flags 
 _atom_site_disorder_assembly 
 _atom_site_disorder_group 
Ag1 Ag 0.44992(3) 0.63212(2) 0.55533(3) 0.03140(10) Uani 1 1 d . . . 
Ag2 Ag 0.74969(3) 0.62048(3) 0.38251(3) 0.04182(11) Uani 1 1 d . . . 
Cl1 Cl 0.22065(9) 0.65096(8) -0.27364(8) 0.03386(19) Uani 1 1 d . . . 
S1 S 0.22551(8) 0.48151(7) 0.27321(8) 0.02489(17) Uani 1 1 d . . . 
O1W O 0.9537(4) 0.6991(4) 0.4184(7) 0.0943(15) Uani 1 1 d D . . 
H1W1 H 1.011(8) 0.648(5) 0.394(10) 0.141 Uiso 1 1 d D . . 
H1W2 H 0.962(9) 0.765(4) 0.375(9) 0.141 Uiso 1 1 d D . . 
O1 O 0.2319(3) 0.5603(2) 0.3993(3) 0.0369(6) Uani 1 1 d . . . 
O2 O 0.0834(3) 0.4620(2) 0.1966(3) 0.0382(6) Uani 1 1 d . . . 
O3 O 0.3011(3) 0.3701(2) 0.3155(3) 0.0402(6) Uani 1 1 d . . . 
O4 O 0.5307(2) 0.5638(2) 0.3252(2) 0.0273(5) Uani 1 1 d . . . 
C1 C 0.3150(3) 0.5542(2) 0.1488(3) 0.0203(6) Uani 1 1 d . . . 
C2 C 0.4580(3) 0.5855(3) 0.1921(3) 0.0216(6) Uani 1 1 d . . . 
C3 C 0.5222(3) 0.6407(3) 0.0846(4) 0.0243(6) Uani 1 1 d . . . 
H3 H 0.6156 0.6641 0.1096 0.029 Uiso 1 1 calc R . . 
C4 C 0.4498(3) 0.6612(3) -0.0572(3) 0.0247(6) Uani 1 1 d . . . 
H4 H 0.4947 0.6967 -0.1263 0.030 Uiso 1 1 calc R . . 
C5 C 0.3096(4) 0.6279(3) -0.0945(3) 0.0242(6) Uani 1 1 d . . . 
C6 C 0.2416(3) 0.5745(3) 0.0065(3) 0.0222(6) Uani 1 1 d . . . 
H6 H 0.1479 0.5522 -0.0199 0.027 Uiso 1 1 calc R . . 
 
loop_ 
 _atom_site_aniso_label 
 _atom_site_aniso_U_11 
 _atom_site_aniso_U_22 
 _atom_site_aniso_U_33 
 _atom_site_aniso_U_23 
 _atom_site_aniso_U_13 
 _atom_site_aniso_U_12 
Ag1 0.03647(17) 0.02827(15) 0.02849(15) 0.00214(9) 0.00359(11) 0.00204(10) 
Ag2 0.02612(16) 0.0554(2) 0.04245(18) 0.00171(13) 0.00242(12) -0.01031(12) 
Cl1 0.0352(4) 0.0448(5) 0.0206(3) 0.0058(3) 0.0028(3) 0.0019(3) 
S1 0.0214(4) 0.0301(4) 0.0224(3) 0.0056(3) 0.0020(3) -0.0026(3) 
O1W 0.042(2) 0.080(3) 0.157(5) 0.035(3) 0.009(2) -0.0045(19) 
O1 0.0369(14) 0.0501(15) 0.0254(11) -0.0040(11) 0.0103(10) -0.0057(12) 
O2 0.0239(12) 0.0550(16) 0.0339(13) 0.0079(12) 0.0011(10) -0.0111(11) 
O3 0.0396(15) 0.0319(13) 0.0477(15) 0.0168(11) 0.0040(12) 0.0010(10) 
O4 0.0226(11) 0.0334(12) 0.0242(10) 0.0005(9) -0.0002(8) -0.0020(9) 
C1 0.0232(14) 0.0190(13) 0.0195(13) 0.0002(11) 0.0063(11) 0.0000(11) 
C2 0.0233(15) 0.0190(13) 0.0223(14) -0.0033(11) 0.0036(11) 0.0034(11) 
C3 0.0226(15) 0.0202(13) 0.0310(15) -0.0033(12) 0.0069(12) -0.0025(11) 
C4 0.0318(17) 0.0200(14) 0.0247(14) -0.0004(12) 0.0111(13) -0.0004(12) 
C5 0.0304(17) 0.0242(15) 0.0175(13) -0.0001(11) 0.0033(12) 0.0027(11) 
C6 0.0197(14) 0.0239(14) 0.0224(13) 0.0015(11) 0.0019(11) 0.0010(11) 
 
_geom_special_details 
; 
 All esds (except the esd in the dihedral angle between two l.s. planes) 
 are estimated using the full covariance matrix.  The cell esds are taken 
 into account individually in the estimation of esds in distances, angles 
 and torsion angles; correlations between esds in cell parameters are only 
 used when they are defined by crystal symmetry.  An approximate (isotropic) 
 treatment of cell esds is used for estimating esds involving l.s. planes. 
; 
 
loop_ 
 _geom_bond_atom_site_label_1 
 _geom_bond_atom_site_label_2 
 _geom_bond_distance 
 _geom_bond_site_symmetry_2 
 _geom_bond_publ_flag 
Ag1 O4 2.458(2) 3_666 ? 
Ag1 O1 2.465(3) . ? 
Ag1 O3 2.487(3) 3_666 ? 
Ag1 O4 2.528(2) . ? 
Ag1 C4 2.548(3) 4_576 ? 
Ag1 C3 2.649(3) 4_576 ? 
Ag1 Ag1 3.3465(8) 3_666 ? 
Ag2 O1W 2.135(4) . ? 
Ag2 O4 2.185(2) . ? 
Ag2 O3 2.937(3) 3_666 ?
Ag2 O1 2.852(2) 3_666 ?
Cl1 C5 1.744(3) . ? 
S1 O2 1.444(2) . ? 
S1 O1 1.460(3) . ? 
S1 O3 1.467(3) . ? 
S1 C1 1.769(3) . ? 
O1W H1W1 0.86(7) . ? 
O1W H1W2 0.85(6) . ? 
O3 Ag1 2.487(3) 3_666 ? 
O4 C2 1.326(3) . ? 
O4 Ag1 2.458(2) 3_666 ? 
C1 C6 1.397(4) . ? 
C1 C2 1.414(4) . ? 
C2 C3 1.414(4) . ? 
C3 C4 1.391(4) . ? 
C3 Ag1 2.649(3) 4_575 ? 
C3 H3 0.9300 . ? 
C4 C5 1.390(5) . ? 
C4 Ag1 2.548(3) 4_575 ? 
C4 H4 0.9300 . ? 
C5 C6 1.381(4) . ? 
C6 H6 0.9300 . ? 
 
loop_ 
 _geom_angle_atom_site_label_1 
 _geom_angle_atom_site_label_2 
 _geom_angle_atom_site_label_3 
 _geom_angle 
 _geom_angle_site_symmetry_1 
 _geom_angle_site_symmetry_3 
 _geom_angle_publ_flag 
O4 Ag1 O1 87.51(8) 3_666 . ? 
O4 Ag1 O3 77.74(8) 3_666 3_666 ? 
O1 Ag1 O3 158.25(9) . 3_666 ? 
O4 Ag1 O4 95.70(7) 3_666 . ? 
O1 Ag1 O4 76.75(8) . . ? 
O3 Ag1 O4 88.76(9) 3_666 . ? 
O4 Ag1 C4 175.35(9) 3_666 4_576 ? 
O1 Ag1 C4 97.08(10) . 4_576 ? 
O3 Ag1 C4 97.64(9) 3_666 4_576 ? 
O4 Ag1 C4 84.68(9) . 4_576 ? 
O4 Ag1 C3 145.23(9) 3_666 4_576 ? 
O1 Ag1 C3 123.88(10) . 4_576 ? 
O3 Ag1 C3 75.29(9) 3_666 4_576 ? 
O4 Ag1 C3 105.20(9) . 4_576 ? 
C4 Ag1 C3 30.96(10) 4_576 4_576 ? 
O4 Ag1 Ag1 48.74(5) 3_666 3_666 ? 
O1 Ag1 Ag1 78.17(7) . 3_666 ? 
O3 Ag1 Ag1 80.08(6) 3_666 3_666 ? 
O4 Ag1 Ag1 46.96(5) . 3_666 ? 
C4 Ag1 Ag1 131.45(7) 4_576 3_666 ? 
C3 Ag1 Ag1 143.26(7) 4_576 3_666 ? 
O1W Ag2 O4 171.27(14) . . ? 
O1W Ag2 O1 104.54(14) . 3_666 ? 
O1W Ag2 O3 98.72(14) . 3_666 ? 
O4 Ag2 O1 83.92(8) . 3_666 ? 
O4 Ag2 O3 85.10(8) . 3_666 ? 
O3 Ag2 O1 49.25(8) 3_666 3_666 ? 
O2 S1 O1 112.37(16) . . ? 
O2 S1 O3 112.64(17) . . ? 
O1 S1 O3 111.04(17) . . ? 
O2 S1 C1 106.73(14) . . ? 
O1 S1 C1 106.87(14) . . ? 
O3 S1 C1 106.75(16) . . ? 
Ag2 O1W H1W1 108(6) . . ? 
Ag2 O1W H1W2 117(6) . . ? 
H1W1 O1W H1W2 110(7) . . ? 
S1 O1 Ag1 124.97(15) . . ? 
S1 O3 Ag1 121.96(15) . 3_666 ? 
C2 O4 Ag2 119.76(19) . . ? 
C2 O4 Ag1 124.62(18) . 3_666 ? 
Ag2 O4 Ag1 99.35(9) . 3_666 ? 
C2 O4 Ag1 122.49(18) . . ? 
Ag2 O4 Ag1 98.38(8) . . ? 
Ag1 O4 Ag1 84.30(7) 3_666 . ? 
C6 C1 C2 121.8(3) . . ? 
C6 C1 S1 117.8(2) . . ? 
C2 C1 S1 120.3(2) . . ? 
O4 C2 C3 120.7(3) . . ? 
O4 C2 C1 122.8(3) . . ? 
C3 C2 C1 116.5(3) . . ? 
C4 C3 C2 122.0(3) . . ? 
C4 C3 Ag1 70.51(17) . 4_575 ? 
C2 C3 Ag1 110.7(2) . 4_575 ? 
C4 C3 H3 119.0 . . ? 
C2 C3 H3 119.0 . . ? 
Ag1 C3 H3 88.8 4_575 . ? 
C5 C4 C3 119.2(3) . . ? 
C5 C4 Ag1 105.8(2) . 4_575 ? 
C3 C4 Ag1 78.53(18) . 4_575 ? 
C5 C4 H4 120.4 . . ? 
C3 C4 H4 120.4 . . ? 
Ag1 C4 H4 85.8 4_575 . ? 
C6 C5 C4 121.1(3) . . ? 
C6 C5 Cl1 119.9(3) . . ? 
C4 C5 Cl1 118.9(2) . . ? 
C5 C6 C1 119.3(3) . . ? 
C5 C6 H6 120.4 . . ? 
C1 C6 H6 120.4 . . ? 
 
loop_ 
 _geom_torsion_atom_site_label_1 
 _geom_torsion_atom_site_label_2 
 _geom_torsion_atom_site_label_3 
 _geom_torsion_atom_site_label_4 
 _geom_torsion 
 _geom_torsion_site_symmetry_1 
 _geom_torsion_site_symmetry_2 
 _geom_torsion_site_symmetry_3 
 _geom_torsion_site_symmetry_4 
 _geom_torsion_publ_flag 
O2 S1 O1 Ag1 -175.62(15) . . . . ? 
O3 S1 O1 Ag1 57.2(2) . . . . ? 
C1 S1 O1 Ag1 -58.9(2) . . . . ? 
O4 Ag1 O1 S1 -78.07(18) 3_666 . . . ? 
O3 Ag1 O1 S1 -31.1(3) 3_666 . . . ? 
O4 Ag1 O1 S1 18.38(17) . . . . ? 
C4 Ag1 O1 S1 101.18(19) 4_576 . . . ? 
C3 Ag1 O1 S1 117.95(18) 4_576 . . . ? 
Ag1 Ag1 O1 S1 -29.78(16) 3_666 . . . ? 
O2 S1 O3 Ag1 178.68(15) . . . 3_666 ? 
O1 S1 O3 Ag1 -54.3(2) . . . 3_666 ? 
C1 S1 O3 Ag1 61.9(2) . . . 3_666 ? 
O4 Ag1 O4 C2 127.8(2) 3_666 . . . ? 
O1 Ag1 O4 C2 41.7(2) . . . . ? 
O3 Ag1 O4 C2 -154.6(2) 3_666 . . . ? 
C4 Ag1 O4 C2 -56.8(2) 4_576 . . . ? 
C3 Ag1 O4 C2 -80.2(2) 4_576 . . . ? 
Ag1 Ag1 O4 C2 127.8(2) 3_666 . . . ? 
O4 Ag1 O4 Ag2 -98.65(9) 3_666 . . . ? 
O1 Ag1 O4 Ag2 175.27(10) . . . . ? 
O3 Ag1 O4 Ag2 -21.10(9) 3_666 . . . ? 
C4 Ag1 O4 Ag2 76.70(10) 4_576 . . . ? 
C3 Ag1 O4 Ag2 53.30(11) 4_576 . . . ? 
Ag1 Ag1 O4 Ag2 -98.65(9) 3_666 . . . ? 
O4 Ag1 O4 Ag1 0.0 3_666 . . 3_666 ? 
O1 Ag1 O4 Ag1 -86.09(8) . . . 3_666 ? 
O3 Ag1 O4 Ag1 77.55(7) 3_666 . . 3_666 ? 
C4 Ag1 O4 Ag1 175.34(9) 4_576 . . 3_666 ? 
C3 Ag1 O4 Ag1 151.94(8) 4_576 . . 3_666 ? 
O2 S1 C1 C6 -2.6(3) . . . . ? 
O1 S1 C1 C6 -123.0(2) . . . . ? 
O3 S1 C1 C6 118.1(3) . . . . ? 
O2 S1 C1 C2 -179.9(2) . . . . ? 
O1 S1 C1 C2 59.7(3) . . . . ? 
O3 S1 C1 C2 -59.2(3) . . . . ? 
Ag2 O4 C2 C3 2.6(4) . . . . ? 
Ag1 O4 C2 C3 -125.9(2) 3_666 . . . ? 
Ag1 O4 C2 C3 126.8(2) . . . . ? 
Ag2 O4 C2 C1 -178.3(2) . . . . ? 
Ag1 O4 C2 C1 53.3(4) 3_666 . . . ? 
Ag1 O4 C2 C1 -54.0(3) . . . . ? 
C6 C1 C2 O4 -177.9(3) . . . . ? 
S1 C1 C2 O4 -0.7(4) . . . . ? 
C6 C1 C2 C3 1.3(4) . . . . ? 
S1 C1 C2 C3 178.5(2) . . . . ? 
O4 C2 C3 C4 177.9(3) . . . . ? 
C1 C2 C3 C4 -1.3(4) . . . . ? 
O4 C2 C3 Ag1 -102.7(3) . . . 4_575 ? 
C1 C2 C3 Ag1 78.1(3) . . . 4_575 ? 
C2 C3 C4 C5 0.9(4) . . . . ? 
Ag1 C3 C4 C5 -101.9(3) 4_575 . . . ? 
C2 C3 C4 Ag1 102.7(3) . . . 4_575 ? 
C3 C4 C5 C6 -0.4(5) . . . . ? 
Ag1 C4 C5 C6 -85.9(3) 4_575 . . . ? 
C3 C4 C5 Cl1 -178.7(2) . . . . ? 
Ag1 C4 C5 Cl1 95.8(2) 4_575 . . . ? 
C4 C5 C6 C1 0.4(5) . . . . ? 
Cl1 C5 C6 C1 178.6(2) . . . . ? 
C2 C1 C6 C5 -0.9(4) . . . . ? 
S1 C1 C6 C5 -178.1(2) . . . . ? 
 
loop_ 
 _geom_hbond_atom_site_label_D 
 _geom_hbond_atom_site_label_H 
 _geom_hbond_atom_site_label_A 
 _geom_hbond_distance_DH 
 _geom_hbond_distance_HA 
 _geom_hbond_distance_DA 
 _geom_hbond_angle_DHA 
 _geom_hbond_site_symmetry_A 
O1W H1W1 O1  0.86(7) 2.35(4) 3.149(5) 156(9) 1_655 
O1W H1W2 O2  0.85(6) 2.33(3) 3.141(5) 158(7) 2_655 
 
_diffrn_measured_fraction_theta_max    0.998 
_diffrn_reflns_theta_full              27.42 
_diffrn_measured_fraction_theta_full   0.998 
_refine_diff_density_max    0.933 
_refine_diff_density_min   -0.597 
_refine_diff_density_rms    0.145 

#===END
 
data_complex3 
 
_audit_creation_method            SHELXL-97 
_chemical_name_systematic 
; 
 ? 
; 
_chemical_name_common             ? 
_chemical_melting_point           ? 
_chemical_formula_moiety          'C6 H5 Ag2 Br O5 S' 
_chemical_formula_sum 
 'C6 H5 Ag2 Br O5 S' 
_chemical_formula_weight          484.81 
 
loop_ 
 _atom_type_symbol 
 _atom_type_description 
 _atom_type_scat_dispersion_real 
 _atom_type_scat_dispersion_imag 
 _atom_type_scat_source 
 'C'  'C'   0.0033   0.0016 
 'International Tables Vol C Tables 4.2.6.8 and 6.1.1.4' 
 'H'  'H'   0.0000   0.0000 
 'International Tables Vol C Tables 4.2.6.8 and 6.1.1.4' 
 'O'  'O'   0.0106   0.0060 
 'International Tables Vol C Tables 4.2.6.8 and 6.1.1.4' 
 'S'  'S'   0.1246   0.1234 
 'International Tables Vol C Tables 4.2.6.8 and 6.1.1.4' 
 'Br'  'Br'  -0.2901   2.4595 
 'International Tables Vol C Tables 4.2.6.8 and 6.1.1.4' 
 'Ag'  'Ag'  -0.8971   1.1015 
 'International Tables Vol C Tables 4.2.6.8 and 6.1.1.4' 
 
_symmetry_cell_setting            'monoclinic'
_symmetry_space_group_name_H-M    'P 21/c'
_symmetry_space_group_name_Hall   '-P 2ybc' 
 
loop_ 
 _symmetry_equiv_pos_as_xyz 
 'x, y, z' 
 '-x, y+1/2, -z+1/2' 
 '-x, -y, -z' 
 'x, -y-1/2, z-1/2' 
 
_cell_length_a                    9.7366(19) 
_cell_length_b                    11.322(2) 
_cell_length_c                    9.4589(19) 
_cell_angle_alpha                 90.00 
_cell_angle_beta                  101.22(3) 
_cell_angle_gamma                 90.00 
_cell_volume                      1022.8(4) 
_cell_formula_units_Z             4 
_cell_measurement_temperature     295(2) 
_cell_measurement_reflns_used     7870 
_cell_measurement_theta_min       3.29
_cell_measurement_theta_max       27.43 
 
_exptl_crystal_description        'prism'  
_exptl_crystal_colour             'colorless'
_exptl_crystal_size_max           0.15 
_exptl_crystal_size_mid           0.12 
_exptl_crystal_size_min           0.09 
_exptl_crystal_density_meas       ? 
_exptl_crystal_density_diffrn     3.148 
_exptl_crystal_density_method     'not measured' 
_exptl_crystal_F_000              904 
_exptl_absorpt_coefficient_mu     7.934 
_exptl_absorpt_correction_type    'multi-scan'   
_exptl_absorpt_correction_T_min   0.3824 
_exptl_absorpt_correction_T_max   0.5354 
_exptl_absorpt_process_details    'ABSCOR (Higashi, 1995)'   
 
_exptl_special_details 
; 
 ? 
; 
 
_diffrn_ambient_temperature       295(2) 
_diffrn_radiation_wavelength      0.71073 
_diffrn_radiation_type            MoK\a 
_diffrn_radiation_source          'fine-focus sealed tube' 
_diffrn_radiation_monochromator   graphite 
_diffrn_measurement_device_type   'Rigaku RAXIS-RAPID' 
_diffrn_measurement_method        '\w' 
_diffrn_detector_area_resol_mean  '10.000'  
_diffrn_standards_number          0 
_diffrn_standards_interval_count  0 
_diffrn_standards_interval_time   0 
_diffrn_standards_decay_%         0 
_diffrn_reflns_number             9716 
_diffrn_reflns_av_R_equivalents   0.0489 
_diffrn_reflns_av_sigmaI/netI     0.0429 
_diffrn_reflns_limit_h_min        -12 
_diffrn_reflns_limit_h_max        12 
_diffrn_reflns_limit_k_min        -14 
_diffrn_reflns_limit_k_max        14 
_diffrn_reflns_limit_l_min        -11 
_diffrn_reflns_limit_l_max        12 
_diffrn_reflns_theta_min          3.28 
_diffrn_reflns_theta_max          27.44 
_reflns_number_total              2335 
_reflns_number_gt                 2061 
_reflns_threshold_expression      >2sigma(I) 
 
_computing_data_collection        'RAPID-AUTO (Rigaku Corporation, 1998)' 
_computing_cell_refinement        'RAPID-AUTO' 
_computing_data_reduction         
'CrystalStructure (Rigaku/MSC and Rigaku Corporation, 2002)'  
_computing_structure_solution     'SHELXS-97 (Sheldrick, 1997)' 
_computing_structure_refinement   'SHELXL-97 (Sheldrick, 1997)' 
_computing_molecular_graphics     'SHELXL-97' 
_computing_publication_material   'SHELXL-97'
 
_refine_special_details 
; 
 Refinement of F^2^ against ALL reflections.  The weighted R-factor wR and 
 goodness of fit S are based on F^2^, conventional R-factors R are based 
 on F, with F set to zero for negative F^2^. The threshold expression of 
 F^2^ > 2sigma(F^2^) is used only for calculating R-factors(gt) etc. and is 
 not relevant to the choice of reflections for refinement.  R-factors based 
 on F^2^ are statistically about twice as large as those based on F, and R- 
 factors based on ALL data will be even larger. 
; 
 
_refine_ls_structure_factor_coef  Fsqd  
_refine_ls_matrix_type            full 
_refine_ls_weighting_scheme       calc  
_refine_ls_weighting_details 
 'calc w=1/[\s^2^(Fo^2^)+(0.0242P)^2^+1.9562P] where P=(Fo^2^+2Fc^2^)/3' 
_atom_sites_solution_primary      direct 
_atom_sites_solution_secondary    difmap 
_atom_sites_solution_hydrogens    geom 
_refine_ls_hydrogen_treatment     mixed 
_refine_ls_extinction_method      none 
_refine_ls_extinction_coef        ? 
_refine_ls_number_reflns          2335 
_refine_ls_number_parameters      142 
_refine_ls_number_restraints      3 
_refine_ls_R_factor_all           0.0349 
_refine_ls_R_factor_gt            0.0296 
_refine_ls_wR_factor_ref          0.0748 
_refine_ls_wR_factor_gt           0.0682 
_refine_ls_goodness_of_fit_ref    1.073 
_refine_ls_restrained_S_all       1.072 
_refine_ls_shift/su_max           0.001 
_refine_ls_shift/su_mean          0.000 
 
loop_ 
 _atom_site_label 
 _atom_site_type_symbol 
 _atom_site_fract_x 
 _atom_site_fract_y 
 _atom_site_fract_z 
 _atom_site_U_iso_or_equiv 
 _atom_site_adp_type 
 _atom_site_occupancy 
 _atom_site_symmetry_multiplicity 
 _atom_site_calc_flag 
 _atom_site_refinement_flags 
 _atom_site_disorder_assembly 
 _atom_site_disorder_group 
Ag1 Ag 0.44845(4) 0.36852(3) 0.05802(3) 0.03559(11) Uani 1 1 d . . . 
Ag2 Ag 0.25148(4) 0.62221(4) 0.10908(4) 0.04793(13) Uani 1 1 d . . . 
Br1 Br 0.77906(5) 0.64486(4) 0.77999(4) 0.03609(13) Uani 1 1 d . . . 
S1 S 0.77591(10) 0.48400(9) 0.22551(10) 0.0291(2) Uani 1 1 d . . . 
O1 O 0.6998(4) 0.3748(3) 0.1788(4) 0.0435(8) Uani 1 1 d . . . 
O1W O 0.0505(5) 0.7041(5) 0.0865(8) 0.1019(19) Uani 1 1 d D . . 
H1W1 H -0.023(6) 0.667(7) 0.097(11) 0.153 Uiso 1 1 d D . . 
H1W2 H 0.049(9) 0.774(3) 0.121(10) 0.153 Uiso 1 1 d D . . 
O2 O 0.7733(3) 0.5640(3) 0.1045(3) 0.0416(7) Uani 1 1 d . . . 
O3 O 0.9160(3) 0.4622(3) 0.3050(3) 0.0427(8) Uani 1 1 d . . . 
O4 O 0.4723(3) 0.5689(3) 0.1674(3) 0.0319(6) Uani 1 1 d . . . 
C1 C 0.6843(4) 0.5539(3) 0.3459(4) 0.0261(8) Uani 1 1 d . . . 
C2 C 0.5424(4) 0.5875(3) 0.3006(4) 0.0254(8) Uani 1 1 d . . . 
C3 C 0.4766(4) 0.6407(3) 0.4050(4) 0.0301(9) Uani 1 1 d . . . 
H3 H 0.3839 0.6649 0.3784 0.036 Uiso 1 1 calc R . . 
C4 C 0.5456(4) 0.6581(3) 0.5452(4) 0.0289(8) Uani 1 1 d . . . 
H4 H 0.4992 0.6918 0.6123 0.035 Uiso 1 1 calc R . . 
C5 C 0.6858(4) 0.6245(3) 0.5856(4) 0.0267(8) Uani 1 1 d . . . 
C6 C 0.7547(4) 0.5724(3) 0.4873(4) 0.0267(8) Uani 1 1 d . . . 
H6 H 0.8479 0.5497 0.5153 0.032 Uiso 1 1 calc R . . 
 
loop_ 
 _atom_site_aniso_label 
 _atom_site_aniso_U_11 
 _atom_site_aniso_U_22 
 _atom_site_aniso_U_33 
 _atom_site_aniso_U_23 
 _atom_site_aniso_U_13 
 _atom_site_aniso_U_12 
Ag1 0.0364(2) 0.03516(19) 0.03520(19) -0.00222(13) 0.00694(14) -0.00233(13) 
Ag2 0.0284(2) 0.0633(3) 0.0513(2) -0.00082(18) 0.00566(16) 0.01263(16) 
Br1 0.0343(3) 0.0476(3) 0.0266(2) -0.00526(18) 0.00648(17) -0.00172(18) 
S1 0.0228(5) 0.0370(5) 0.0272(4) -0.0056(4) 0.0040(4) 0.0025(4) 
O1 0.0396(19) 0.0376(17) 0.0523(19) -0.0137(15) 0.0065(16) 0.0001(14) 
O1W 0.046(3) 0.086(4) 0.171(5) -0.043(4) 0.015(3) 0.003(2) 
O2 0.0388(18) 0.056(2) 0.0322(14) 0.0043(14) 0.0118(13) 0.0053(15) 
O3 0.0229(15) 0.065(2) 0.0384(15) -0.0082(16) 0.0017(12) 0.0114(14) 
O4 0.0241(14) 0.0398(16) 0.0301(13) -0.0004(12) 0.0008(11) 0.0019(12) 
C1 0.0213(19) 0.0291(19) 0.0279(18) 0.0010(16) 0.0050(15) -0.0002(15) 
C2 0.0198(18) 0.0270(18) 0.0289(18) 0.0010(16) 0.0033(15) -0.0011(15) 
C3 0.0224(19) 0.029(2) 0.039(2) 0.0032(17) 0.0074(17) 0.0016(15) 
C4 0.031(2) 0.0234(18) 0.036(2) -0.0023(16) 0.0142(17) 0.0017(16) 
C5 0.027(2) 0.030(2) 0.0255(17) 0.0009(15) 0.0084(16) -0.0011(15) 
C6 0.0232(19) 0.0270(19) 0.0298(18) -0.0005(16) 0.0051(15) -0.0011(15) 
 
_geom_special_details 
; 
 All esds (except the esd in the dihedral angle between two l.s. planes) 
 are estimated using the full covariance matrix.  The cell esds are taken 
 into account individually in the estimation of esds in distances, angles 
 and torsion angles; correlations between esds in cell parameters are only 
 used when they are defined by crystal symmetry.  An approximate (isotropic) 
 treatment of cell esds is used for estimating esds involving l.s. planes. 
; 
 
loop_ 
 _geom_bond_atom_site_label_1 
 _geom_bond_atom_site_label_2 
 _geom_bond_distance 
 _geom_bond_site_symmetry_2 
 _geom_bond_publ_flag 
Ag1 O4 2.486(3) . ? 
Ag1 O1 2.492(4) . ? 
Ag1 O4 2.507(3) 3_665 ? 
Ag1 O2 2.513(3) 3_665 ? 
Ag1 C4 2.580(4) 2_645 ? 
Ag1 C3 2.684(4) 2_645 ? 
Ag1 Br1 2.9324(9) 3_666 ? 
Ag2 O1W 2.138(5) . ? 
Ag2 O4 2.197(3) . ? 
Ag2 O1 2.854(4) 3_665 ? 
Ag2 O2 2.897(3) 3_665 ? 
Br1 C5 1.900(4) . ? 
Br1 Ag1 2.9324(9) 3_666 ? 
S1 O3 1.445(3) . ? 
S1 O2 1.456(3) . ? 
S1 O1 1.464(3) . ? 
S1 C1 1.765(4) . ? 
O1W H1W1 0.85(7) . ? 
O1W H1W2 0.86(5) . ? 
O2 Ag1 2.513(3) 3_665 ? 
O4 C2 1.327(4) . ? 
O4 Ag1 2.507(3) 3_665 ? 
C1 C6 1.395(5) . ? 
C1 C2 1.417(5) . ? 
C2 C3 1.412(6) . ? 
C3 C4 1.379(6) . ? 
C3 Ag1 2.684(4) 2_655 ? 
C3 H3 0.9300 . ? 
C4 C5 1.396(6) . ? 
C4 Ag1 2.580(4) 2_655 ? 
C4 H4 0.9300 . ? 
C5 C6 1.381(5) . ? 
C6 H6 0.9300 . ? 
 
loop_ 
 _geom_angle_atom_site_label_1 
 _geom_angle_atom_site_label_2 
 _geom_angle_atom_site_label_3 
 _geom_angle 
 _geom_angle_site_symmetry_1 
 _geom_angle_site_symmetry_3 
 _geom_angle_publ_flag 
O4 Ag1 O1 77.25(9) . . ? 
O4 Ag1 O4 94.42(9) . 3_665 ? 
O1 Ag1 O4 86.81(10) . 3_665 ? 
O4 Ag1 O2 88.67(10) . 3_665 ? 
O1 Ag1 O2 157.17(11) . 3_665 ? 
O4 Ag1 O2 76.34(9) 3_665 3_665 ? 
O4 Ag1 C4 173.41(11) . 2_645 ? 
O1 Ag1 C4 96.19(12) . 2_645 ? 
O4 Ag1 C4 84.60(11) 3_665 2_645 ? 
O2 Ag1 C4 97.41(12) 3_665 2_645 ? 
O4 Ag1 C3 145.25(11) . 2_645 ? 
O1 Ag1 C3 75.53(11) . 2_645 ? 
O4 Ag1 C3 105.15(11) 3_665 2_645 ? 
O2 Ag1 C3 123.43(12) 3_665 2_645 ? 
C4 Ag1 C3 30.29(12) 2_645 2_645 ? 
O4 Ag1 Br1 81.28(7) . 3_666 ? 
O1 Ag1 Br1 122.43(8) . 3_666 ? 
O4 Ag1 Br1 147.99(6) 3_665 3_666 ? 
O2 Ag1 Br1 71.88(7) 3_665 3_666 ? 
C4 Ag1 Br1 102.99(9) 2_645 3_666 ? 
C3 Ag1 Br1 95.51(9) 2_645 3_666 ? 
O1W Ag2 O4 167.36(17) . . ? 
O1W Ag2 O1 102.61(17) . 3_665 ? 
O1W Ag2 O2 107.18(17) . 3_665 ? 
O4 Ag2 O1 84.64(11) . 3_665 ? 
O4 Ag2 O2 85.40(10) . 3_665 ? 
O1 Ag2 O2 49.46(9) 3_665 3_665 ?
C5 Br1 Ag1 103.41(12) . 3_666 ? 
O3 S1 O2 112.7(2) . . ? 
O3 S1 O1 112.6(2) . . ? 
O2 S1 O1 110.9(2) . . ? 
O3 S1 C1 106.59(17) . . ? 
O2 S1 C1 107.12(19) . . ? 
O1 S1 C1 106.47(19) . . ? 
S1 O1 Ag1 123.82(18) . . ? 
Ag2 O1W H1W1 123(6) . . ? 
Ag2 O1W H1W2 117(6) . . ? 
H1W1 O1W H1W2 110(8) . . ? 
S1 O2 Ag1 123.48(19) . 3_665 ? 
C2 O4 Ag2 119.5(2) . . ? 
C2 O4 Ag1 121.9(2) . . ? 
Ag2 O4 Ag1 97.97(10) . . ? 
C2 O4 Ag1 125.2(2) . 3_665 ? 
Ag2 O4 Ag1 99.02(10) . 3_665 ? 
Ag1 O4 Ag1 85.58(9) . 3_665 ? 
C6 C1 C2 121.2(4) . . ? 
C6 C1 S1 118.0(3) . . ? 
C2 C1 S1 120.7(3) . . ? 
O4 C2 C3 120.8(3) . . ? 
O4 C2 C1 122.4(3) . . ? 
C3 C2 C1 116.8(3) . . ? 
C4 C3 C2 122.0(4) . . ? 
C4 C3 Ag1 70.7(2) . 2_655 ? 
C2 C3 Ag1 110.7(3) . 2_655 ? 
C4 C3 H3 119.0 . . ? 
C2 C3 H3 119.0 . . ? 
Ag1 C3 H3 88.7 2_655 . ? 
C3 C4 C5 119.5(4) . . ? 
C3 C4 Ag1 79.0(2) . 2_655 ? 
C5 C4 Ag1 105.2(3) . 2_655 ? 
C3 C4 H4 120.3 . . ? 
C5 C4 H4 120.3 . . ? 
Ag1 C4 H4 85.9 2_655 . ? 
C6 C5 C4 120.6(4) . . ? 
C6 C5 Br1 120.0(3) . . ? 
C4 C5 Br1 119.3(3) . . ? 
C5 C6 C1 119.8(4) . . ? 
C5 C6 H6 120.1 . . ? 
C1 C6 H6 120.1 . . ? 
 
loop_ 
 _geom_torsion_atom_site_label_1 
 _geom_torsion_atom_site_label_2 
 _geom_torsion_atom_site_label_3 
 _geom_torsion_atom_site_label_4 
 _geom_torsion 
 _geom_torsion_site_symmetry_1 
 _geom_torsion_site_symmetry_2 
 _geom_torsion_site_symmetry_3 
 _geom_torsion_site_symmetry_4 
 _geom_torsion_publ_flag 
O3 S1 O1 Ag1 174.31(19) . . . . ? 
O2 S1 O1 Ag1 -58.4(3) . . . . ? 
C1 S1 O1 Ag1 57.9(3) . . . . ? 
O4 Ag1 O1 S1 -17.2(2) . . . . ? 
O4 Ag1 O1 S1 78.0(2) 3_665 . . . ? 
O2 Ag1 O1 S1 35.9(4) 3_665 . . . ? 
C4 Ag1 O1 S1 162.2(2) 2_645 . . . ? 
C3 Ag1 O1 S1 -175.4(3) 2_645 . . . ? 
Br1 Ag1 O1 S1 -88.1(2) 3_666 . . . ? 
O3 S1 O2 Ag1 -177.96(18) . . . 3_665 ? 
O1 S1 O2 Ag1 54.8(3) . . . 3_665 ? 
C1 S1 O2 Ag1 -61.0(2) . . . 3_665 ? 
O1W Ag2 O4 C2 31.4(11) . . . . ? 
O1W Ag2 O4 Ag1 165.2(9) . . . . ? 
O1W Ag2 O4 Ag1 -108.0(10) . . . 3_665 ? 
O1 Ag1 O4 C2 -43.5(3) . . . . ? 
O4 Ag1 O4 C2 -129.2(3) 3_665 . . . ? 
O2 Ag1 O4 C2 154.6(3) 3_665 . . . ? 
C3 Ag1 O4 C2 -4.4(4) 2_645 . . . ? 
Br1 Ag1 O4 C2 82.7(3) 3_666 . . . ? 
O1 Ag1 O4 Ag2 -175.78(13) . . . . ? 
O4 Ag1 O4 Ag2 98.51(11) 3_665 . . . ? 
O2 Ag1 O4 Ag2 22.32(11) 3_665 . . . ? 
C3 Ag1 O4 Ag2 -136.64(17) 2_645 . . . ? 
Br1 Ag1 O4 Ag2 -49.55(8) 3_666 . . . ? 
O1 Ag1 O4 Ag1 85.71(10) . . . 3_665 ? 
O4 Ag1 O4 Ag1 0.0 3_665 . . 3_665 ? 
O2 Ag1 O4 Ag1 -76.18(9) 3_665 . . 3_665 ? 
C3 Ag1 O4 Ag1 124.85(18) 2_645 . . 3_665 ? 
Br1 Ag1 O4 Ag1 -148.06(7) 3_666 . . 3_665 ? 
O3 S1 C1 C6 -1.5(4) . . . . ? 
O2 S1 C1 C6 -122.4(3) . . . . ? 
O1 S1 C1 C6 118.9(3) . . . . ? 
O3 S1 C1 C2 179.9(3) . . . . ? 
O2 S1 C1 C2 59.1(4) . . . . ? 
O1 S1 C1 C2 -59.7(4) . . . . ? 
Ag2 O4 C2 C3 0.1(5) . . . . ? 
Ag1 O4 C2 C3 -122.5(3) . . . . ? 
Ag1 O4 C2 C3 128.3(3) 3_665 . . . ? 
Ag2 O4 C2 C1 179.2(3) . . . . ? 
Ag1 O4 C2 C1 56.5(5) . . . . ? 
Ag1 O4 C2 C1 -52.6(5) 3_665 . . . ? 
C6 C1 C2 O4 -178.8(4) . . . . ? 
S1 C1 C2 O4 -0.3(5) . . . . ? 
C6 C1 C2 C3 0.3(6) . . . . ? 
S1 C1 C2 C3 178.8(3) . . . . ? 
O4 C2 C3 C4 178.1(4) . . . . ? 
C1 C2 C3 C4 -0.9(6) . . . . ? 
O4 C2 C3 Ag1 -102.3(4) . . . 2_655 ? 
C1 C2 C3 Ag1 78.6(4) . . . 2_655 ? 
C2 C3 C4 C5 1.4(6) . . . . ? 
Ag1 C3 C4 C5 -101.4(4) 2_655 . . . ? 
C2 C3 C4 Ag1 102.8(4) . . . 2_655 ? 
C3 C4 C5 C6 -1.2(6) . . . . ? 
Ag1 C4 C5 C6 -87.0(4) 2_655 . . . ? 
C3 C4 C5 Br1 -178.4(3) . . . . ? 
Ag1 C4 C5 Br1 95.8(3) 2_655 . . . ? 
Ag1 Br1 C5 C6 -150.0(3) 3_666 . . . ? 
Ag1 Br1 C5 C4 27.2(3) 3_666 . . . ? 
C4 C5 C6 C1 0.5(6) . . . . ? 
Br1 C5 C6 C1 177.7(3) . . . . ? 
C2 C1 C6 C5 -0.1(6) . . . . ? 
S1 C1 C6 C5 -178.6(3) . . . . ? 
 
loop_ 
 _geom_hbond_atom_site_label_D 
 _geom_hbond_atom_site_label_H 
 _geom_hbond_atom_site_label_A 
 _geom_hbond_distance_DH 
 _geom_hbond_distance_HA 
 _geom_hbond_distance_DA 
 _geom_hbond_angle_DHA 
 _geom_hbond_site_symmetry_A 
O1W H1W1 O2  0.85(7) 2.31(7) 3.164(6) 175(10) 1_455 
O1W H1W2 O3  0.86(5) 2.25(4) 3.093(6) 168(8) 2_655 
 
_diffrn_measured_fraction_theta_max    0.998 
_diffrn_reflns_theta_full              27.44 
_diffrn_measured_fraction_theta_full   0.998 
_refine_diff_density_max    0.976 
_refine_diff_density_min   -0.710 
_refine_diff_density_rms    0.138 


#===END


 
data_complex4 
 
_audit_creation_method            SHELXL-97 
_chemical_name_systematic 
; 
 ? 
; 
_chemical_name_common             ? 
_chemical_melting_point           ? 
_chemical_formula_moiety          'C6 H2 Ag4 N O11 S2, Ag H6 N2'  
_chemical_formula_sum 
 'C6 H8 Ag5 N3 O11 S2' 
_chemical_formula_weight          901.62 
 
loop_ 
 _atom_type_symbol 
 _atom_type_description 
 _atom_type_scat_dispersion_real 
 _atom_type_scat_dispersion_imag 
 _atom_type_scat_source 
 'C'  'C'   0.0033   0.0016 
 'International Tables Vol C Tables 4.2.6.8 and 6.1.1.4' 
 'H'  'H'   0.0000   0.0000 
 'International Tables Vol C Tables 4.2.6.8 and 6.1.1.4' 
 'N'  'N'   0.0061   0.0033 
 'International Tables Vol C Tables 4.2.6.8 and 6.1.1.4' 
 'O'  'O'   0.0106   0.0060 
 'International Tables Vol C Tables 4.2.6.8 and 6.1.1.4' 
 'S'  'S'   0.1246   0.1234 
 'International Tables Vol C Tables 4.2.6.8 and 6.1.1.4' 
 'Ag'  'Ag'  -0.8971   1.1015 
 'International Tables Vol C Tables 4.2.6.8 and 6.1.1.4' 
 
_symmetry_cell_setting            'Monoclinic' 
_symmetry_space_group_name_H-M    'C 2/m'
_symmetry_space_group_name_Hall   '-C 2y' 
 
loop_ 
 _symmetry_equiv_pos_as_xyz 
 'x, y, z' 
 '-x, y, -z' 
 'x+1/2, y+1/2, z' 
 '-x+1/2, y+1/2, -z' 
 '-x, -y, -z' 
 'x, -y, z' 
 '-x+1/2, -y+1/2, -z' 
 'x+1/2, -y+1/2, z' 
 
_cell_length_a                    11.761(2) 
_cell_length_b                    23.561(5) 
_cell_length_c                    5.7475(11) 
_cell_angle_alpha                 90.00 
_cell_angle_beta                  91.35(3) 
_cell_angle_gamma                 90.00 
_cell_volume                      1592.2(5) 
_cell_formula_units_Z             4 
_cell_measurement_temperature     295(2) 
_cell_measurement_reflns_used     6190 
_cell_measurement_theta_min       3.12 
_cell_measurement_theta_max       24.46 
 
_exptl_crystal_description        prism 
_exptl_crystal_colour             yellow  
_exptl_crystal_size_max           0.21 
_exptl_crystal_size_mid           0.18 
_exptl_crystal_size_min           0.14 
_exptl_crystal_density_meas       ? 
_exptl_crystal_density_diffrn     3.761 
_exptl_crystal_density_method     'not measured' 
_exptl_crystal_F_000              1680 
_exptl_absorpt_coefficient_mu     6.370 
_exptl_absorpt_correction_type    'multi-scan'
_exptl_absorpt_correction_T_min   0.3481 
_exptl_absorpt_correction_T_max   0.4692 
_exptl_absorpt_process_details    'ABSCOR (Higashi, 1995)' 
 
_exptl_special_details 
; 
 ? 
; 
 
_diffrn_ambient_temperature       295(2) 
_diffrn_radiation_wavelength      0.71073 
_diffrn_radiation_type            MoK\a 
_diffrn_radiation_source          'fine-focus sealed tube' 
_diffrn_radiation_monochromator   graphite 
_diffrn_measurement_device_type   'Rigaku RAXIS-RAPID' 
_diffrn_measurement_method        '\w scan' 
_diffrn_detector_area_resol_mean  '10.000' 
_diffrn_standards_number          0 
_diffrn_standards_interval_count  0 
_diffrn_standards_interval_time   0 
_diffrn_standards_decay_%         0 
_diffrn_reflns_number             7861 
_diffrn_reflns_av_R_equivalents   0.1028 
_diffrn_reflns_av_sigmaI/netI     0.0774 
_diffrn_reflns_limit_h_min        -15 
_diffrn_reflns_limit_h_max        13 
_diffrn_reflns_limit_k_min        -30 
_diffrn_reflns_limit_k_max        30 
_diffrn_reflns_limit_l_min        -7 
_diffrn_reflns_limit_l_max        7 
_diffrn_reflns_theta_min          3.12 
_diffrn_reflns_theta_max          27.47 
_reflns_number_total              1868 
_reflns_number_gt                 1736 
_reflns_threshold_expression      'I>2\s(I)' 
 
_computing_data_collection        'RAPID-AUTO (Rigaku Corporation, 1998)' 
_computing_cell_refinement        'RAPID-AUTO' 
_computing_data_reduction         
'CrystalStructure (Rigaku/MSC and Rigaku Corporation, 2002)' 
_computing_structure_solution     'SHELXS-97 (Sheldrick, 1997)' 
_computing_structure_refinement   'SHELXL-97 (Sheldrick, 1997)' 
_computing_molecular_graphics     'ORTEP-II (Johnson, 1976)'
_computing_publication_material   SHELXL-97 
 
_refine_special_details 
; 
 Refinement of F^2^ against ALL reflections.  The weighted R-factor wR and 
 goodness of fit S are based on F^2^, conventional R-factors R are based 
 on F, with F set to zero for negative F^2^. The threshold expression of 
 F^2^ > 2sigma(F^2^) is used only for calculating R-factors(gt) etc. and is 
 not relevant to the choice of reflections for refinement.  R-factors based 
 on F^2^ are statistically about twice as large as those based on F, and R- 
 factors based on ALL data will be even larger. 
; 
 
_refine_ls_structure_factor_coef  Fsqd  
_refine_ls_matrix_type            full 
_refine_ls_weighting_scheme       calc  
_refine_ls_weighting_details 
 'calc w=1/[\s^2^(Fo^2^)+(0.0573P)^2^+16.3518P] where P=(Fo^2^+2Fc^2^)/3' 
_atom_sites_solution_primary      direct 
_atom_sites_solution_secondary    difmap 
_atom_sites_solution_hydrogens    geom 
_refine_ls_hydrogen_treatment     mixed 
_refine_ls_extinction_method      none 
_refine_ls_extinction_coef        ? 
_refine_ls_number_reflns          1868 
_refine_ls_number_parameters      139 
_refine_ls_number_restraints      13 
_refine_ls_R_factor_all           0.0521 
_refine_ls_R_factor_gt            0.0494 
_refine_ls_wR_factor_ref          0.1259 
_refine_ls_wR_factor_gt           0.1236 
_refine_ls_goodness_of_fit_ref    1.083 
_refine_ls_restrained_S_all       1.079 
_refine_ls_shift/su_max           0.001 
_refine_ls_shift/su_mean          0.000 
 
loop_ 
 _atom_site_label 
 _atom_site_type_symbol 
 _atom_site_fract_x 
 _atom_site_fract_y 
 _atom_site_fract_z 
 _atom_site_U_iso_or_equiv 
 _atom_site_adp_type 
 _atom_site_occupancy 
 _atom_site_symmetry_multiplicity 
 _atom_site_calc_flag 
 _atom_site_refinement_flags 
 _atom_site_disorder_assembly 
 _atom_site_disorder_group 
Ag1 Ag 0.13916(4) 0.26199(2) 0.33609(8) 0.0284(2) Uani 1 1 d . . . 
Ag2 Ag 0.30926(5) 0.14031(2) 0.19092(9) 0.0341(2) Uani 1 1 d . . . 
Ag3 Ag 0.26410(9) 0.5000 -0.05718(16) 0.0472(3) Uani 1 2 d SD . . 
S1 S 0.33067(12) 0.36785(6) 0.3059(2) 0.0203(3) Uani 1 1 d . . . 
O1 O 0.2140(4) 0.3578(2) 0.2147(8) 0.0277(10) Uani 1 1 d . . . 
O2 O 0.3642(4) 0.4264(2) 0.2837(9) 0.0340(11) Uani 1 1 d . . . 
O3 O 0.3423(4) 0.3467(2) 0.5447(8) 0.0298(10) Uani 1 1 d . . . 
O4 O 0.3416(4) 0.23977(18) 0.2513(8) 0.0235(9) Uani 1 1 d . . . 
O5 O 0.4367(10) 0.0758(3) 0.361(2) 0.0333(11) Uani 1 1 d . . . 
O6 O 0.5000 0.1531(4) 0.5000 0.049(2) Uani 1 2 d S . . 
N1 N 0.5000 0.1016(5) 0.5000 0.067(4) Uani 1 2 d S . . 
N2 N 0.1329(14) 0.5000 0.172(3) 0.114(7) Uani 1 2 d SD . . 
H2N1 H 0.0929(19) 0.4705(2) 0.149(5) 0.171 Uiso 1 1 d D . . 
H2N2 H 0.160(3) 0.5000 0.310(4) 0.171 Uiso 1 2 d SD . . 
N3 N 0.3978(10) 0.5000 -0.2949(17) 0.046(2) Uani 1 2 d SD . . 
H3N1 H 0.455(8) 0.5000 -0.200(19) 0.070 Uiso 1 2 d SD . . 
H3N2 H 0.400(7) 0.4705(2) -0.380(3) 0.070 Uiso 1 1 d D . . 
C1 C 0.5000 0.2388(3) 0.0000 0.0183(15) Uani 1 2 d S . . 
H1 H 0.5000 0.1993 0.0000 0.022 Uiso 1 2 calc SR . . 
C2 C 0.4171(5) 0.2678(2) 0.1357(10) 0.0185(11) Uani 1 1 d . . . 
C3 C 0.4219(5) 0.3280(2) 0.1347(9) 0.0194(11) Uani 1 1 d . . . 
C4 C 0.5000 0.3564(3) 0.0000 0.0180(15) Uani 1 2 d S . . 
H4 H 0.5000 0.3959 0.0000 0.022 Uiso 1 2 calc SR . . 
 
loop_ 
 _atom_site_aniso_label 
 _atom_site_aniso_U_11 
 _atom_site_aniso_U_22 
 _atom_site_aniso_U_33 
 _atom_site_aniso_U_23 
 _atom_site_aniso_U_13 
 _atom_site_aniso_U_12 
Ag1 0.0260(3) 0.0387(3) 0.0204(3) 0.00296(18) 0.0001(2) -0.00156(18) 
Ag2 0.0390(3) 0.0374(3) 0.0263(3) -0.00303(19) 0.0074(2) -0.0022(2) 
Ag3 0.0543(6) 0.0490(5) 0.0386(5) 0.000 0.0070(4) 0.000 
S1 0.0200(7) 0.0245(7) 0.0168(7) -0.0023(5) 0.0067(5) 0.0016(5) 
O1 0.018(2) 0.040(3) 0.025(2) 0.0009(18) 0.0067(19) 0.0026(17) 
O2 0.037(3) 0.025(2) 0.041(3) -0.010(2) 0.014(2) 0.0024(19) 
O3 0.031(2) 0.044(3) 0.015(2) -0.0003(18) 0.0074(18) 0.006(2) 
O4 0.023(2) 0.028(2) 0.021(2) 0.0022(16) 0.0099(18) -0.0028(16) 
O5 0.034(3) 0.021(2) 0.038(3) -0.007(2) 0.010(2) 0.0021(19)  
O6 0.037(4) 0.046(5) 0.065(6) 0.000 0.022(4) 0.000 
N1 0.063(7) 0.039(6) 0.095(10) 0.000 -0.050(7) 0.000 
N2 0.054(8) 0.21(2) 0.076(12) 0.000 0.017(9) 0.000 
N3 0.064(7) 0.047(6) 0.029(5) 0.000 0.009(5) 0.000 
C1 0.019(4) 0.019(4) 0.018(4) 0.000 0.003(3) 0.000 
C2 0.019(3) 0.025(3) 0.012(2) 0.0017(19) 0.000(2) 0.001(2) 
C3 0.021(3) 0.024(3) 0.014(2) -0.001(2) 0.004(2) 0.001(2) 
C4 0.020(4) 0.015(3) 0.019(4) 0.000 0.006(3) 0.000 
 
_geom_special_details 
; 
 All esds (except the esd in the dihedral angle between two l.s. planes) 
 are estimated using the full covariance matrix.  The cell esds are taken 
 into account individually in the estimation of esds in distances, angles 
 and torsion angles; correlations between esds in cell parameters are only 
 used when they are defined by crystal symmetry.  An approximate (isotropic) 
 treatment of cell esds is used for estimating esds involving l.s. planes. 
; 
 
loop_ 
 _geom_bond_atom_site_label_1 
 _geom_bond_atom_site_label_2 
 _geom_bond_distance 
 _geom_bond_site_symmetry_2 
 _geom_bond_publ_flag 
Ag1 O4 2.377(5) 7_556 ? 
Ag1 O4 2.497(5) . ? 
Ag1 C1 2.5022(9) 7 ? 
Ag1 C2 2.863(6) 7 ?
Ag1 C2 2.915(6) 8_455 ?
Ag1 O1 2.528(5) . ? 
Ag1 O3 2.659(5) 7_556 ?
Ag1 O6 2.764(5) 7_556 ?
Ag1 Ag1 3.2304(14) 7_556 ? 
Ag2 O5 2.334(8) . ? 
Ag2 O6 2.845(2) . ? 
Ag2 O1 2.341(5) 7 ? 
Ag2 O3 2.389(4) 7_556 ? 
Ag2 O4 2.398(4) . ? 
Ag3 N2 2.051(16) . ? 
Ag3 N3 2.107(10) . ? 
Ag3 O2 2.850(5) . ?
Ag3 O2 2.850(5) 6_565 ?
S1 O2 1.443(5) . ? 
S1 O3 1.463(5) . ? 
S1 O1 1.476(5) . ? 
S1 C3 1.747(6) . ? 
O1 Ag2 2.341(5) 7 ? 
O3 Ag2 2.389(4) 7_556 ? 
O4 C2 1.302(7) . ? 
O4 Ag1 2.377(5) 7_556 ? 
O5 N1 1.238(10) . ? 
O6 N1 1.213(14) . ? 
N1 O5 1.238(10) 2_656 ? 
N2 H2N1 0.85(2) . ? 
N2 H2N2 0.85(3) . ? 
N3 H3N1 0.86(11) . ? 
N3 H3N2 0.851(14) . ? 
C1 C2 1.437(7) 2_655 ? 
C1 C2 1.437(7) . ? 
C1 Ag1 2.5022(9) 7 ? 
C1 Ag1 2.5022(9) 8 ? 
C1 H1 0.9300 . ? 
C2 C3 1.418(8) . ? 
C3 C4 1.388(7) . ? 
C4 C3 1.388(7) 2_655 ? 
C4 H4 0.9300 . ? 
 
loop_ 
 _geom_angle_atom_site_label_1 
 _geom_angle_atom_site_label_2 
 _geom_angle_atom_site_label_3 
 _geom_angle 
 _geom_angle_site_symmetry_1 
 _geom_angle_site_symmetry_3 
 _geom_angle_publ_flag 
O4 Ag1 O4 97.02(14) 7_556 . ? 
O4 Ag1 C1 144.60(11) 7_556 7 ? 
O4 Ag1 C1 117.20(12) . 7 ? 
O4 Ag1 O1 105.39(16) 7_556 . ? 
O4 Ag1 O1 78.09(14) . . ? 
C1 Ag1 O1 91.1(2) 7 . ? 
C1 Ag1 O3 103.9(2) 7 7_556  ? 
O4 Ag1 O3 77.03(14) . 7_556 ?
O4 Ag1 O3 73.79(15) 7_556 7_556 ?
O1 Ag1 O3 154.77(15) . 7_556 ?
O3 Ag1 O6 130.9(1) 7_556 7_556 ?
C1 Ag1 O6 83.50(14) 7 7_556  ? 
O4 Ag1 O6 142.5(1) . 7_556 ?
O4 Ag1 O6 73.5(1) 7_556 7_556 ?
O1 Ag1 O6 70.2(1) . 7_556 ?
O4 Ag1 Ag1 50.10(11) 7_556 7_556 ? 
O4 Ag1 Ag1 46.92(11) . 7_556 ? 
C1 Ag1 Ag1 162.41(11) 7 7_556 ? 
O1 Ag1 Ag1 92.05(11) . 7_556 ? 
O5 Ag2 O1 119.2(4) . 7 ? 
O5 Ag2 O3 107.3(4) . 7_556 ? 
O1 Ag2 O3 124.02(16) 7 7_556 ? 
O5 Ag2 O4 118.5(2) . . ? 
O1 Ag2 O4 98.07(16) 7 . ? 
O3 Ag2 O4 84.34(16) 7_556 . ? 
O6 Ag2 O1 133.8(1) . 7 ? 
O6 Ag2 O3 100.3(4) . 7_556 ?
O6 Ag2 O4 71.7(1) . . ?
O5 Ag2 O6 47.0(3) . . ?
N2 Ag3 N3 179.5(6) . . ? 
N2 Ag3 O2 82.2(4) . . ?
O2 Ag3 N3 98.2(3) . . ?
O2 S1 O3 112.9(3) . . ? 
O2 S1 O1 112.0(3) . . ? 
O3 S1 O1 110.2(3) . . ? 
O2 S1 C3 107.0(3) . . ? 
O3 S1 C3 107.5(3) . . ? 
O1 S1 C3 107.0(3) . . ? 
S1 O1 Ag2 115.9(2) . 7 ? 
S1 O1 Ag1 111.8(3) . . ? 
Ag2 O1 Ag1 104.96(19) 7 . ? 
S1 O3 Ag2 119.9(3) . 7_556 ? 
C2 O4 Ag1 117.9(4) . 7_556 ? 
C2 O4 Ag2 122.0(4) . . ? 
Ag1 O4 Ag2 97.95(15) 7_556 . ? 
C2 O4 Ag1 131.2(4) . . ? 
Ag1 O4 Ag1 82.98(13) 7_556 . ? 
Ag2 O4 Ag1 94.85(15) . . ? 
N1 O5 Ag2 108.7(6) . . ? 
O6 N1 O5 119.4(6) . . ? 
O6 N1 O5 119.4(6) . 2_656 ? 
O5 N1 O5 121.2(12) . 2_656 ? 
Ag3 N2 H2N1 108.8(15) . . ? 
Ag3 N2 H2N2 108.9(19) . . ? 
H2N1 N2 H2N2 110(6) . . ? 
Ag3 N3 H3N1 100(10) . . ? 
Ag3 N3 H3N2 114(5) . . ? 
H3N1 N3 H3N2 109(6) . . ? 
C2 C1 C2 123.1(7) 2_655 . ? 
C2 C1 Ag1 91.4(2) 2_655 7 ? 
C2 C1 Ag1 89.0(2) . 7 ? 
C2 C1 Ag1 89.0(2) 2_655 8 ? 
C2 C1 Ag1 91.4(2) . 8 ? 
Ag1 C1 Ag1 179.2(4) 7 8 ? 
C2 C1 H1 118.5 2_655 . ? 
C2 C1 H1 118.5 . . ? 
Ag1 C1 H1 89.6 7 . ? 
Ag1 C1 H1 89.6 8 . ? 
O4 C2 C3 122.5(5) . . ? 
O4 C2 C1 121.0(5) . . ? 
C3 C2 C1 116.5(5) . . ? 
C4 C3 C2 120.8(5) . . ? 
C4 C3 S1 118.6(5) . . ? 
C2 C3 S1 120.7(4) . . ? 
C3 C4 C3 122.3(7) . 2_655 ? 
C3 C4 H4 118.9 . . ? 
C3 C4 H4 118.9 2_655 . ? 
 
loop_ 
 _geom_torsion_atom_site_label_1 
 _geom_torsion_atom_site_label_2 
 _geom_torsion_atom_site_label_3 
 _geom_torsion_atom_site_label_4 
 _geom_torsion 
 _geom_torsion_site_symmetry_1 
 _geom_torsion_site_symmetry_2 
 _geom_torsion_site_symmetry_3 
 _geom_torsion_site_symmetry_4 
 _geom_torsion_publ_flag 
O2 S1 O1 Ag2 73.0(3) . . . 7 ? 
O3 S1 O1 Ag2 -160.5(3) . . . 7 ? 
C3 S1 O1 Ag2 -44.0(3) . . . 7 ? 
O2 S1 O1 Ag1 -166.8(2) . . . . ? 
O3 S1 O1 Ag1 -40.3(3) . . . . ? 
C3 S1 O1 Ag1 76.2(3) . . . . ? 
O4 Ag1 O1 S1 54.8(3) 7_556 . . . ? 
O4 Ag1 O1 S1 -39.3(2) . . . . ? 
C1 Ag1 O1 S1 -156.9(3) 7 . . . ? 
Ag1 Ag1 O1 S1 5.8(2) 7_556 . . . ? 
O4 Ag1 O1 Ag2 -178.78(15) 7_556 . . 7 ? 
O4 Ag1 O1 Ag2 87.11(18) . . . 7 ? 
C1 Ag1 O1 Ag2 -30.49(16) 7 . . 7 ? 
Ag1 Ag1 O1 Ag2 132.20(14) 7_556 . . 7 ? 
O2 S1 O3 Ag2 86.4(4) . . . 7_556 ? 
O1 S1 O3 Ag2 -39.6(4) . . . 7_556 ? 
C3 S1 O3 Ag2 -155.9(3) . . . 7_556 ? 
O5 Ag2 O4 C2 78.6(6) . . . . ? 
O1 Ag2 O4 C2 -51.1(5) 7 . . . ? 
O3 Ag2 O4 C2 -174.8(5) 7_556 . . . ? 
O5 Ag2 O4 Ag1 -51.6(5) . . . 7_556 ? 
O1 Ag2 O4 Ag1 178.74(14) 7 . . 7_556 ? 
O3 Ag2 O4 Ag1 55.12(17) 7_556 . . 7_556 ? 
O5 Ag2 O4 Ag1 -135.1(5) . . . . ? 
O1 Ag2 O4 Ag1 95.18(16) 7 . . . ? 
O3 Ag2 O4 Ag1 -28.45(16) 7_556 . . . ? 
O4 Ag1 O4 C2 -121.2(5) 7_556 . . . ? 
C1 Ag1 O4 C2 68.1(6) 7 . . . ? 
O1 Ag1 O4 C2 -16.9(5) . . . . ? 
Ag1 Ag1 O4 C2 -121.2(5) 7_556 . . . ? 
O4 Ag1 O4 Ag1 0.0 7_556 . . 7_556 ? 
C1 Ag1 O4 Ag1 -170.7(2) 7 . . 7_556 ? 
O1 Ag1 O4 Ag1 104.32(16) . . . 7_556 ? 
O4 Ag1 O4 Ag2 97.44(15) 7_556 . . . ? 
C1 Ag1 O4 Ag2 -73.2(2) 7 . . . ? 
O1 Ag1 O4 Ag2 -158.24(19) . . . . ? 
Ag1 Ag1 O4 Ag2 97.44(15) 7_556 . . . ? 
O1 Ag2 O5 N1 129.9(8) 7 . . . ? 
O3 Ag2 O5 N1 -82.2(10) 7_556 . . . ? 
O4 Ag2 O5 N1 10.8(11) . . . . ? 
Ag2 O5 N1 O6 -11.3(11) . . . . ? 
Ag2 O5 N1 O5 168.7(11) . . . 2_656 ? 
Ag1 O4 C2 C3 -71.8(6) 7_556 . . . ? 
Ag2 O4 C2 C3 167.1(4) . . . . ? 
Ag1 O4 C2 C3 34.4(8) . . . . ? 
Ag1 O4 C2 C1 108.7(5) 7_556 . . . ? 
Ag2 O4 C2 C1 -12.4(7) . . . . ? 
Ag1 O4 C2 C1 -145.1(4) . . . . ? 
C2 C1 C2 O4 178.2(6) 2_655 . . . ? 
Ag1 C1 C2 O4 87.2(5) 7 . . . ? 
Ag1 C1 C2 O4 -92.1(5) 8 . . . ? 
C2 C1 C2 C3 -1.4(4) 2_655 . . . ? 
Ag1 C1 C2 C3 -92.4(5) 7 . . . ? 
Ag1 C1 C2 C3 88.3(5) 8 . . . ? 
O4 C2 C3 C4 -176.7(5) . . . . ? 
C1 C2 C3 C4 2.8(7) . . . . ? 
O4 C2 C3 S1 4.0(8) . . . . ? 
C1 C2 C3 S1 -176.4(3) . . . . ? 
O2 S1 C3 C4 -4.8(5) . . . . ? 
O3 S1 C3 C4 -126.2(4) . . . . ? 
O1 S1 C3 C4 115.5(4) . . . . ? 
O2 S1 C3 C2 174.5(5) . . . . ? 
O3 S1 C3 C2 53.0(6) . . . . ? 
O1 S1 C3 C2 -65.3(5) . . . . ? 
C2 C3 C4 C3 -1.5(4) . . . 2_655 ? 
S1 C3 C4 C3 177.8(5) . . . 2_655 ? 
 
loop_ 
 _geom_hbond_atom_site_label_D 
 _geom_hbond_atom_site_label_H 
 _geom_hbond_atom_site_label_A 
 _geom_hbond_distance_DH 
 _geom_hbond_distance_HA 
 _geom_hbond_distance_DA 
 _geom_hbond_angle_DHA 
 _geom_hbond_site_symmetry_A 
N2 H2N1 O5  0.85(2) 2.48(3) 3.133(17) 134.2(19) 8_455 
N3 H3N2 O2  0.851(14) 2.22(2) 2.997(10) 151(4) 1_554 
 
_diffrn_measured_fraction_theta_max    0.994 
_diffrn_reflns_theta_full              27.47 
_diffrn_measured_fraction_theta_full   0.994 
_refine_diff_density_max    2.663 
_refine_diff_density_min   -1.457 
_refine_diff_density_rms    0.291 
